# Supplementary material for: Performance of Lung-RADS in different target populations: a systematic review and meta-analysis
Source: Springer Nature journal article supplement (doi:10.1007/s00330-023-10049-9), 2023-08-30
Supplement: MOESM1 [file 25980768]

# **Performance of Lung-RADS in Different Target Populations: A Systematic Review and Meta-Analysis**

**Electronic Supplementary Material (ESM)**

**Table S1.** Quality Assessment of Diagnostic Accuracy Studies (QUADAS-2) tool, version 2.

| Domain                     | Description                                                                                                    | Rate                   |
|----------------------------|----------------------------------------------------------------------------------------------------------------|------------------------|
| 1. Patient selection       |                                                                                                                |                        |
| Risk of Bias               | Could the selection of patients have introduced bias?                                                          | Risk: Low/High/Unclear |
| <i>Signaling questions</i> | Was a consecutive or random sample of patients enrolled?                                                       | Yes/No/Unclear         |
|                            | Was a case-control design avoided?                                                                             | Yes/No/Unclear         |
|                            | Did the study avoid inappropriate exclusions?                                                                  | Yes/No/Unclear         |
| Applicability              | Are there concerns that the included patients and setting do not match the review question?                    | Risk: Low/High/Unclear |
| 2. Index Test              |                                                                                                                |                        |
| Risk of Bias               | Could the conduct or interpretation of the index test have introduced bias?                                    | Risk: Low/High/Unclear |
| <i>Signaling questions</i> | Were the index test results interpreted without knowledge of the results of the reference standard?            | Yes/No/Unclear         |
|                            | If a threshold was used, was it prespecified?                                                                  | Yes/No/Unclear         |
| Applicability              | Are there concerns that the index test, its conduct, or interpretation differ from the review question?        | Risk: Low/High/Unclear |
| 3. Reference Standard      |                                                                                                                |                        |
| Risk of Bias               | Could the reference standard, its conduct, or its interpretation have introduced bias?                         | Risk: Low/High/Unclear |
| <i>Signaling questions</i> | Is the reference standard likely to correctly classify the target condition?                                   | Yes/No/Unclear         |
|                            | Were the reference standard results interpreted without knowledge of the results of the index test?            | Yes/No/Unclear         |
| Applicability              | Are there concerns that the target condition as defined by the reference standard does not match the question? | Risk: Low/High/Unclear |
| 4. Flow and Timing         |                                                                                                                |                        |
| Risk of Bias               | Could the patient flow have introduced bias?                                                                   | Risk: Low/High/Unclear |
| <i>Signaling questions</i> | Was there an appropriate interval between index test (s) and reference standard?                               | Yes/No/Unclear         |
|                            | Did all patients receive the same reference standard?                                                          | Yes/No/Unclear         |
|                            | Were more than 90% of patients included in the analysis?                                                       | Yes/No/Unclear         |

**Table S2.** Details of quality assessment result.

| Study               | Risk of Bias      |    |    |      |            |    |      |                    |    |      |                 |    |    |      | Applicability     |            |                    |
|---------------------|-------------------|----|----|------|------------|----|------|--------------------|----|------|-----------------|----|----|------|-------------------|------------|--------------------|
|                     | Patient selection |    |    |      | Index Test |    |      | Reference Standard |    |      | Flow and Timing |    |    |      | Patient selection | Index Test | Reference Standard |
|                     | Q1                | Q2 | Q3 | Risk | Q1         | Q2 | Risk | Q1                 | Q2 | Risk | Q1              | Q2 | Q3 | Risk | Risk              | Risk       | Risk               |
| Pinsky 2015         | Y                 | Y  | Y  | L    | Y          | Y  | L    | Y                  | Y  | L    | Y               | Y  | Y  | L    | L                 | L          | L                  |
| McKee 2015          | Y                 | Y  | Y  | L    | Y          | Y  | L    | Y                  | Y  | L    | Y               | N  | N  | H    | L                 | L          | L                  |
| Halpenny 2016       | Y                 | Y  | Y  | L    | Y          | Y  | L    | Y                  | Y  | L    | U               | Y  | Y  | U    | L                 | L          | L                  |
| Guichet 2017        | Y                 | Y  | Y  | L    | Y          | Y  | L    | Y                  | Y  | L    | Y               | N  | Y  | H    | L                 | L          | L                  |
| Jacobs 2017         | Y                 | Y  | Y  | L    | Y          | Y  | L    | Y                  | Y  | L    | Y               | Y  | Y  | L    | L                 | L          | L                  |
| Marshall 2017       | Y                 | Y  | Y  | L    | Y          | Y  | L    | Y                  | Y  | L    | Y               | Y  | Y  | L    | L                 | L          | L                  |
| Hsu 2018            | Y                 | Y  | Y  | L    | Y          | Y  | L    | Y                  | Y  | L    | Y               | Y  | Y  | L    | L                 | L          | L                  |
| Kang 2018           | Y                 | Y  | Y  | L    | Y          | Y  | L    | Y                  | Y  | L    | Y               | Y  | Y  | L    | L                 | L          | L                  |
| Kim 2018            | Y                 | Y  | Y  | L    | Y          | Y  | L    | Y                  | Y  | L    | Y               | Y  | Y  | L    | U                 | L          | L                  |
| Bhandaria 2019      | Y                 | Y  | Y  | L    | Y          | Y  | L    | Y                  | Y  | L    | U               | Y  | Y  | U    | L                 | L          | L                  |
| Bihan 2019          | Y                 | Y  | Y  | L    | Y          | Y  | L    | Y                  | Y  | L    | U               | Y  | Y  | U    | H                 | L          | L                  |
| Healey 2019         | Y                 | Y  | Y  | L    | Y          | Y  | L    | Y                  | Y  | L    | U               | Y  | Y  | U    | L                 | L          | L                  |
| Kaminetzky 2019     | Y                 | Y  | Y  | L    | Y          | Y  | L    | Y                  | Y  | L    | Y               | N  | Y  | H    | L                 | L          | L                  |
| Meier-Schroers 2019 | Y                 | Y  | Y  | L    | Y          | Y  | L    | Y                  | Y  | L    | U               | Y  | Y  | U    | L                 | L          | L                  |
| Teles 2019          | Y                 | Y  | Y  | L    | Y          | Y  | L    | Y                  | Y  | L    | U               | Y  | Y  | U    | L                 | L          | L                  |
| Tremblay 2019       | Y                 | Y  | Y  | L    | Y          | Y  | L    | Y                  | Y  | L    | Y               | Y  | Y  | L    | L                 | L          | L                  |
| Barbosa 2020        | Y                 | Y  | Y  | L    | Y          | Y  | L    | Y                  | Y  | L    | U               | Y  | Y  | U    | L                 | L          | L                  |
| Hsu 2020            | Y                 | Y  | Y  | L    | Y          | Y  | L    | Y                  | Y  | L    | Y               | Y  | Y  | L    | L                 | L          | L                  |
| Kessler 2020        | Y                 | Y  | N  | H    | Y          | Y  | L    | Y                  | Y  | L    | Y               | Y  | Y  | L    | H                 | L          | L                  |
| Kim 2020            | Y                 | Y  | Y  | L    | Y          | Y  | L    | Y                  | Y  | L    | Y               | Y  | Y  | L    | L                 | L          | L                  |
| Maller 2020         | Y                 | Y  | Y  | L    | Y          | Y  | L    | Y                  | Y  | L    | Y               | Y  | Y  | L    | L                 | L          | L                  |
| O'Dwyer 2020        | Y                 | Y  | Y  | L    | Y          | Y  | L    | Y                  | Y  | L    | U               | Y  | Y  | U    | L                 | L          | L                  |
| White 2020          | Y                 | Y  | Y  | L    | Y          | Y  | L    | Y                  | Y  | L    | U               | N  | Y  | H    | L                 | L          | L                  |
| Darling 2021        | Y                 | Y  | Y  | L    | Y          | Y  | L    | Y                  | Y  | L    | Y               | Y  | Y  | L    | L                 | L          | L                  |
| Erkmen 2021         | Y                 | Y  | Y  | L    | Y          | Y  | L    | Y                  | Y  | L    | Y               | N  | Y  | H    | L                 | L          | L                  |
| Kastner 2021        | Y                 | Y  | N  | H    | Y          | Y  | L    | Y                  | Y  | L    | Y               | Y  | N  | H    | H                 | L          | L                  |
| Parang 2021         | Y                 | Y  | Y  | L    | Y          | Y  | L    | Y                  | Y  | L    | U               | Y  | Y  | U    | L                 | L          | L                  |
| Regis 2021          | Y                 | Y  | Y  | L    | Y          | Y  | L    | Y                  | Y  | L    | Y               | N  | Y  | H    | L                 | L          | L                  |
| Silva 2021          | Y                 | Y  | Y  | L    | Y          | Y  | L    | Y                  | Y  | L    | Y               | Y  | Y  | L    | L                 | L          | L                  |
| Oshiro 2022         | Y                 | Y  | Y  | L    | Y          | Y  | L    | Y                  | Y  | L    | Y               | Y  | Y  | L    | L                 | L          | L                  |
| Panina 2022         | Y                 | Y  | Y  | L    | Y          | Y  | L    | Y                  | Y  | L    | Y               | Y  | Y  | L    | L                 | L          | L                  |

Note: Y=Yes, N=No, U=Unclear, L=Low, H=High

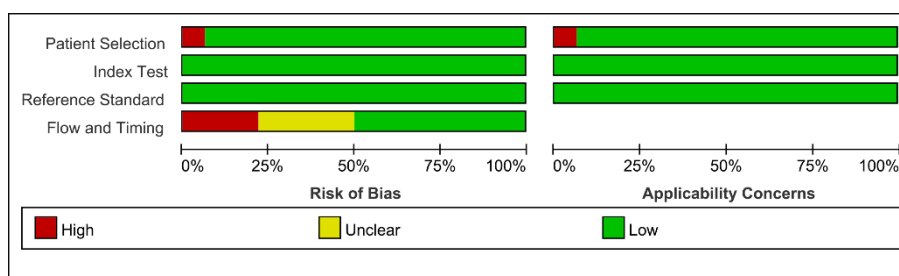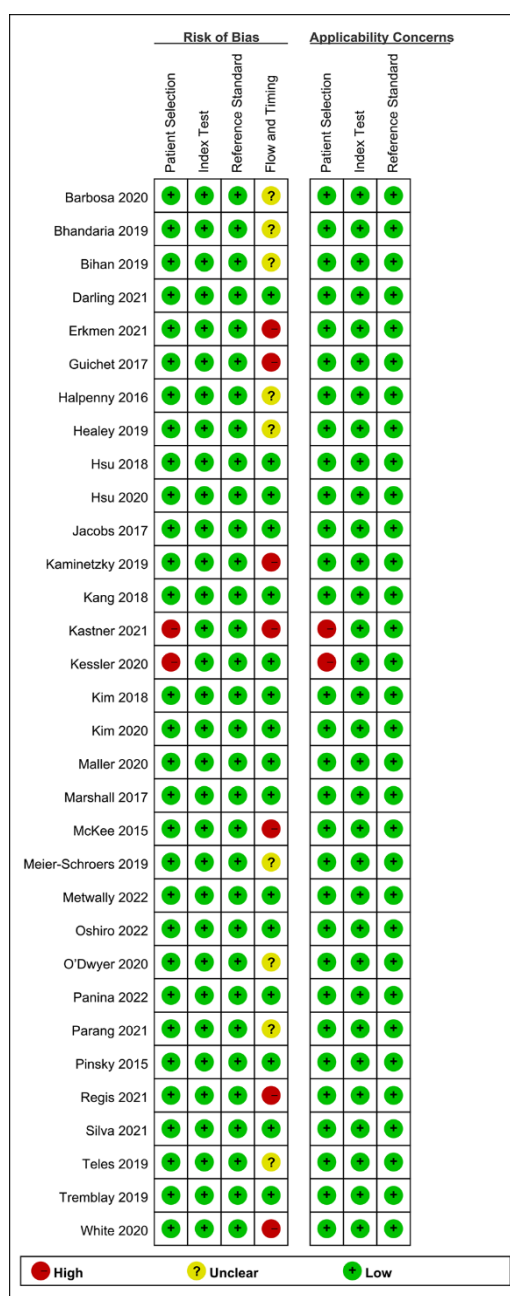

**Figure S1.** The quality assessment results of 31 included studies by the Quality Assessment of Diagnostic Accuracy Studies (QUADAS-2) tool: (a) Methodological quality graph. (b) Summary of rating scores regarding the risk of bias and applicability concerns.

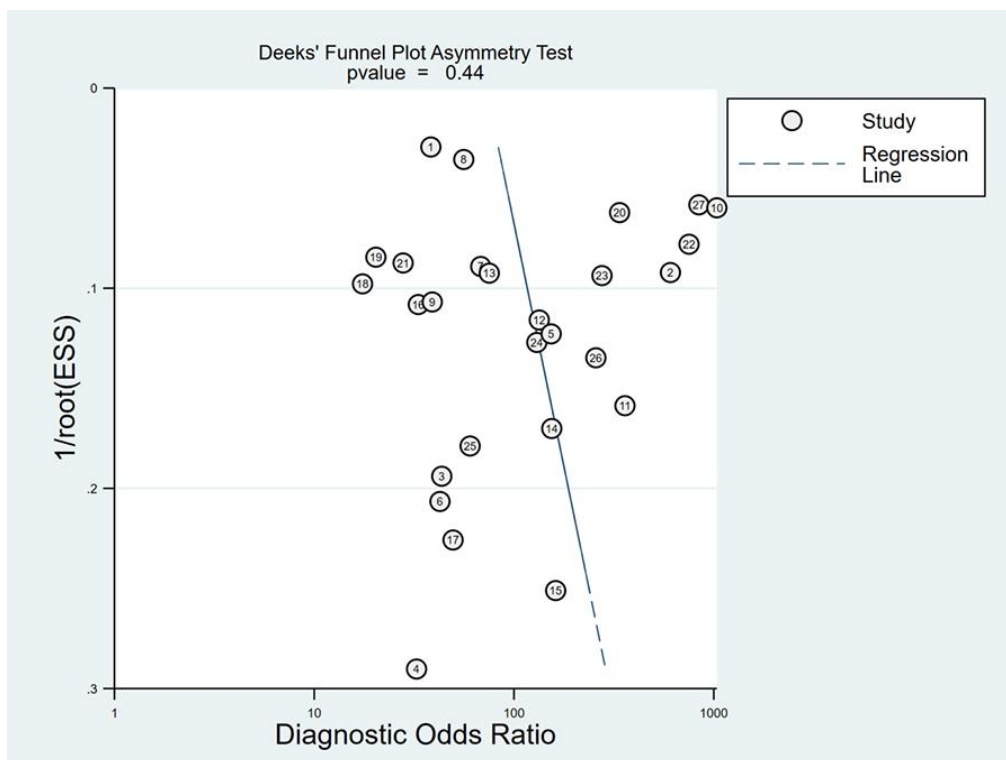

**Figure S2.** Deek's funnel plots for studies that assessed the Lung-RADS version 1.0.
